# Supplementary material for: Nanoporous block copolymer films using highly selective solvents and non-solvent extraction
Source: Royal Society of Chemistry journal article supplement (doi:10.1039/c5sm01867f), 2015-01-01
Supplement: c5sm01867f1.pdf [file c5sm01867f1.pdf]

**Electronic Supplemental Information (ESI) for:**  
**Tunable nanoporous block copolymer films using selective  
solvents and solvents extraction**

Changhuai Ye and Bryan D. Vogt\*

Department of Polymer Engineering, University of Akron, Akron, OH 44325

\* [vogt@uakron.edu](mailto:vogt@uakron.edu)

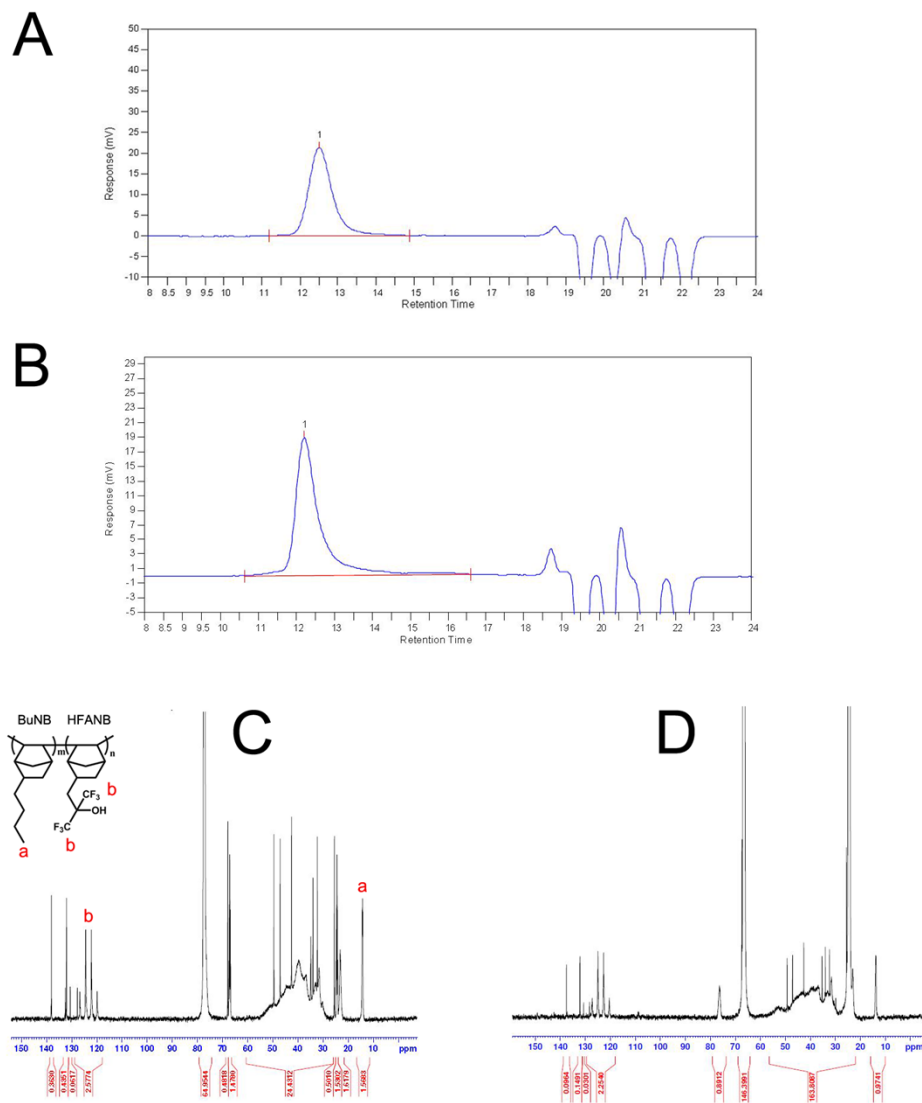

**Figure S1.** (A) GPC trace of 106 kg/mol BuHFA<sub>0.5</sub>, (B) GPC trace of 74 kg/mol BuHFA<sub>0.59</sub>. THF was used as eluent and the flow rate was 1 ml/min using RI detection. (C) <sup>13</sup>C NMR spectrum of BuHFA<sub>0.5</sub>, (D) <sup>13</sup>C NMR spectrum of BuHFA<sub>0.59</sub>.

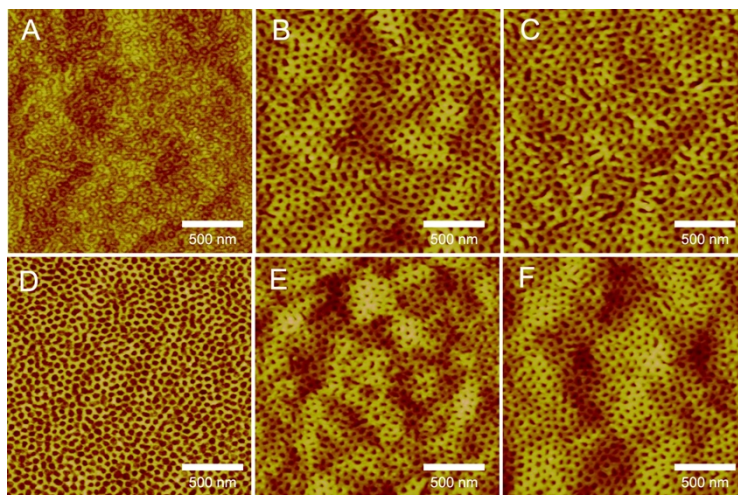

**Figure S2.** AFM height images of (A) as cast BuHFA<sub>0.59</sub> film, (B) porous BuHFA<sub>0.59</sub> film obtained from ethanol swelling, (C) porous BuHFA<sub>0.59</sub> film obtained from butanol swelling, (D) as cast BuHFA<sub>0.50</sub> film, (E) porous BuHFA<sub>0.50</sub> film obtained from ethanol swelling, (F) porous BuHFA<sub>0.50</sub> film obtained from butanol swelling.

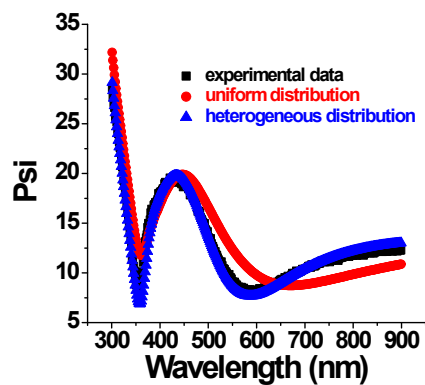

**Figure S3.** The differences in the best fits of the ellipsometric angles for a uniform and heterogeneous solvent distribution for BuHFA<sub>0.59</sub> thin film swollen by ethanol.
